# Supplementary material for: Anionic polymerization of activated oxetane and its copolymerization with ethylene oxide for the synthesis of amphiphilic block copolymers
Source: Royal Society of Chemistry journal article supplement (doi:10.1039/c8py00307f), 2018-01-01
Supplement: c8py00307f1.pdf [file c8py00307f1.pdf]

## Electronic Supplementary Information

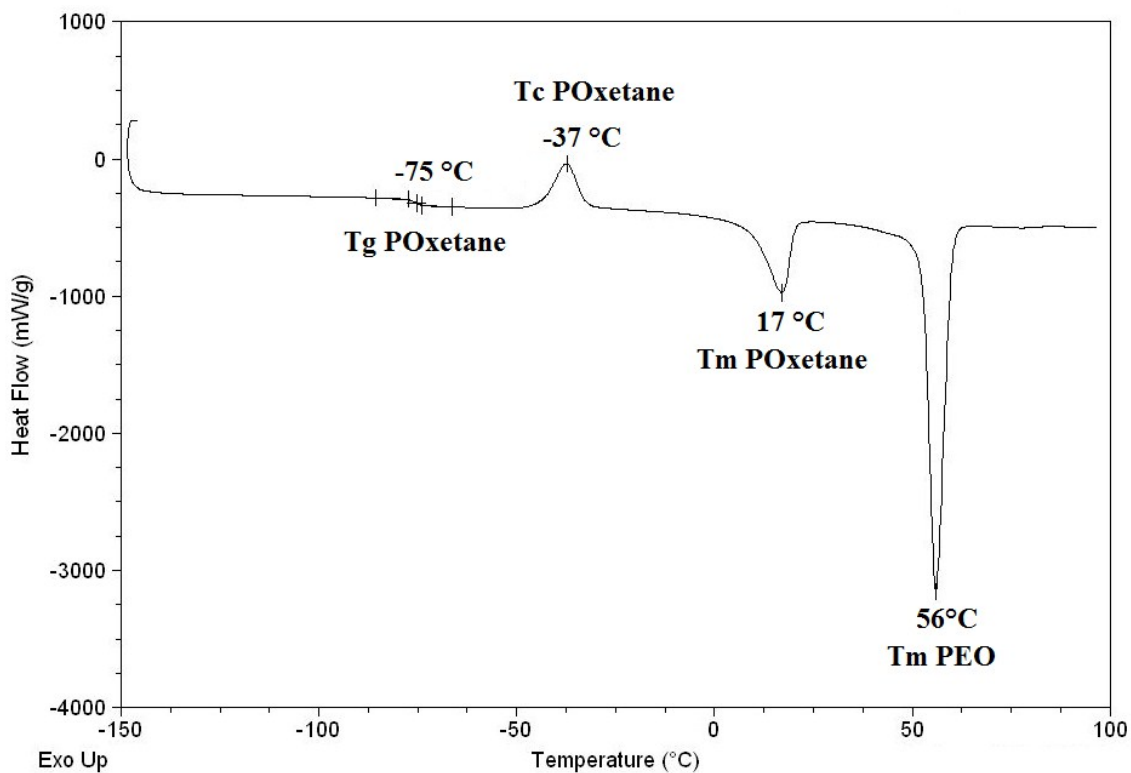

**Figure S1.** DSC analysis of PEO<sub>227</sub>-b-POxetane<sub>172</sub> ( $\overline{Mn}_{SEC} = 21000$  g/mol,  $\overline{D} = 1.24$ , Run 1 Table 2) synthesized by NOct<sub>4</sub>Br/*i*-Bu<sub>3</sub>Al initiating system and simultaneous addition of both monomers ( $[i\text{-Bu}_3\text{Al}]/[\text{NOct}_4\text{Br}] = 4$ ,  $[\text{EO}+\text{Oxetane}] = 3$  M, toluene, 20 °C)

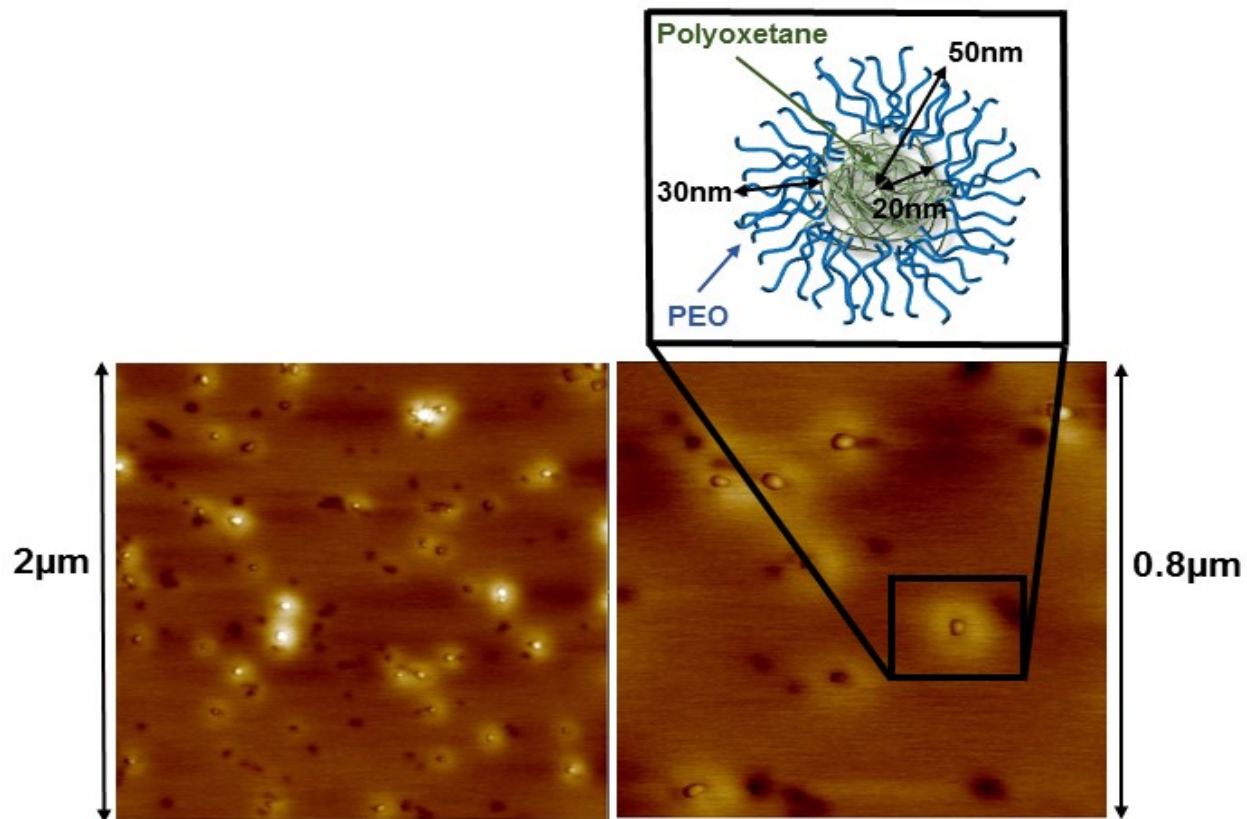

**Figure S2.** AFM pictures of solution of PEO<sub>68</sub>-b-POxetane<sub>52</sub> (Run 3, Table 2) from water at 50 °C on mica surface

**Table S1.** Evolution of molar masses and composition during copolymerization of oxetane and ethylene oxide with addition of EO after 23 hours of reaction (Run 3 Table 3) (NOct<sub>4</sub>Br/*i*-Bu<sub>3</sub>Al (1/4), toluene, [oxetane] = 3 M) leading to POx<sub>a</sub>-*b*-PEO-*b*-POx<sub>b</sub>

| Time<br>(h) | DP <sub>PEO</sub> /DP <sub>POx</sub> <sup>a)</sup> | $\overline{Mn}$ PEO NMR <sup>b)</sup><br>(g/mol) | $\overline{Mn}$ POx <sub>b</sub> <sup>c)</sup><br>(g/mol) | $\overline{Mn}$ NMR <sup>b)</sup><br>(g/mol) | $\overline{Mn}$ SEC <sup>d)</sup><br>(g/mol) | $\overline{D}$ <sup>d)</sup> |
|-------------|----------------------------------------------------|--------------------------------------------------|-----------------------------------------------------------|----------------------------------------------|----------------------------------------------|------------------------------|
| 23          | /                                                  | /                                                | /                                                         | /                                            | 4400                                         | 1.10                         |
| 24          | 0.42                                               | 1400                                             | /                                                         | 5800                                         | 5900                                         | 1.08                         |
| 46          | 0.29                                               | 1400                                             | 1500                                                      | 7800                                         | 7400                                         | 1.21                         |

a) calculated with ratio [PEO]/[POx] by <sup>1</sup>H NMR, b) calculated with the molar mass of the first polyoxetane block observed in SEC, c) calculated with SEC results of final polymer with SEC results of diblock copolymer, d) determined by SEC in THF with PEO standards
